# Supplementary material for: Amorphous cobalt–nickel borides boost electrocatalytic ethanol oxidation coupled with energy-saving hydrogen production
Source: Royal Society of Chemistry journal article supplement (doi:10.1039/d4cy00277f), 2024-01-01
Supplement: d4cy00277f1.pdf [file d4cy00277f1.pdf]

## Electronic Supplementary Information (ESI)

### **Amorphous cobalt-nickel borides boost electrocatalytic ethanol oxidation coupled with energy-saving hydrogen production**

Anqi Hong,<sup>a,†</sup> Xiangbowen Du,<sup>a,†</sup> Kaicheng Qian,<sup>a</sup> Zheng Fang,<sup>a</sup> Yu Duan,<sup>a</sup> Jing Sui,<sup>b</sup> Tong Wei\*,<sup>a</sup> and Renhong Li\*,<sup>a</sup>

a. National Engineering Lab for Textile Fiber Materials and Processing Technology, School of Materials Science & Engineering, Zhejiang Sci-Tech University, Hangzhou 310018, China

b. Department of Chemistry, School of Chemistry and Chemical Engineering, Zhejiang Sci-Tech University, Hangzhou, 310018, PR China.

† These authors contributed equally to this work.

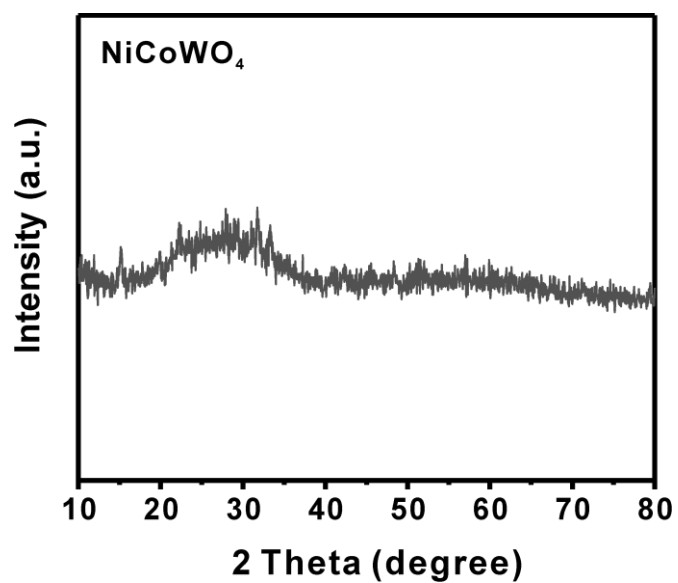

Figure S1. XRD pattern of NiCoWO<sub>4</sub>.

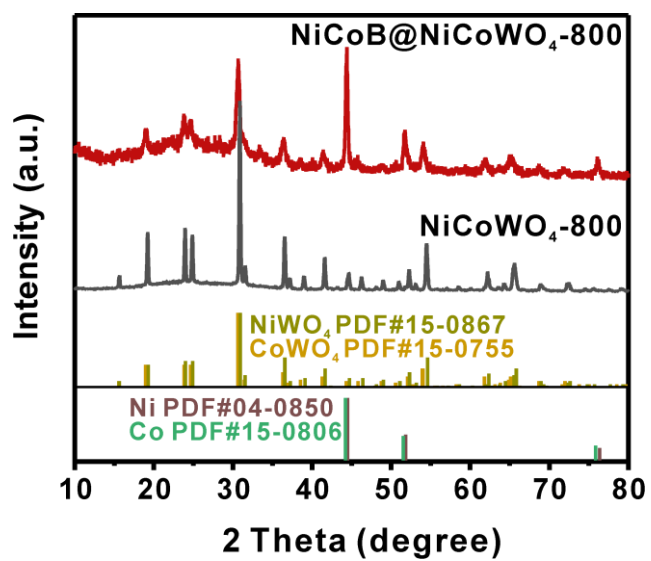

Figure S2. XRD pattern of (a) NiCoB@NiCoWO<sub>4</sub>-800, (b) NiCoWO<sub>4</sub>-800.

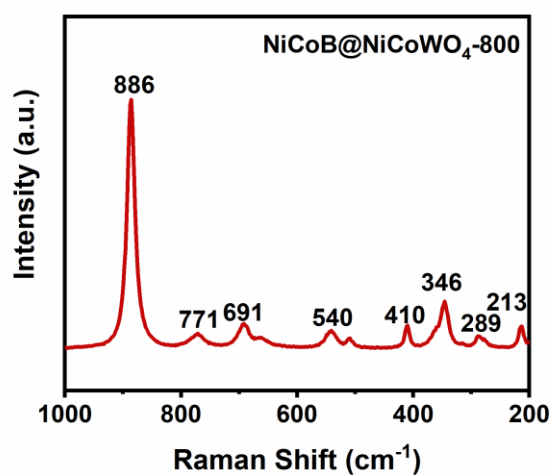

Figure S3. Raman pattern of NiCoB@NiCoWO<sub>4</sub>-800.

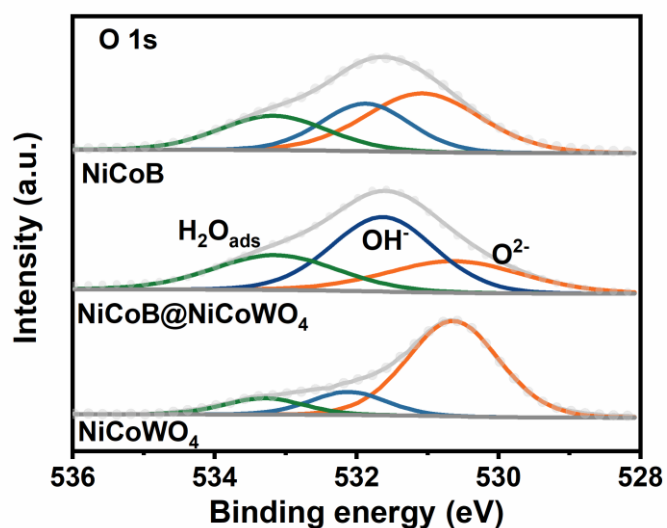

Figure S4. O 1s for the as-prepared catalysts

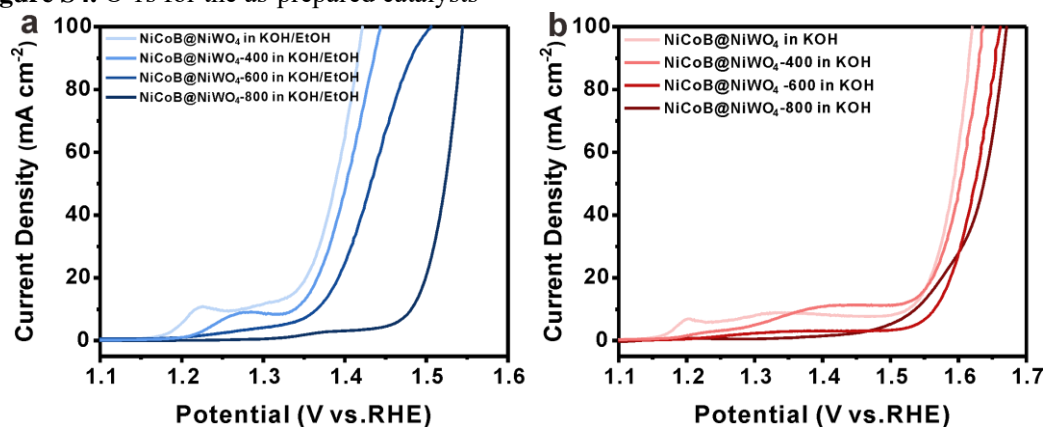

Figure S5. LSV curve of NiB@NiCoWO<sub>4</sub>, NiB@NiCoWO<sub>4</sub>-400, NiB@NiCoWO<sub>4</sub>-600 and NiB@NiCoWO<sub>4</sub>-800.

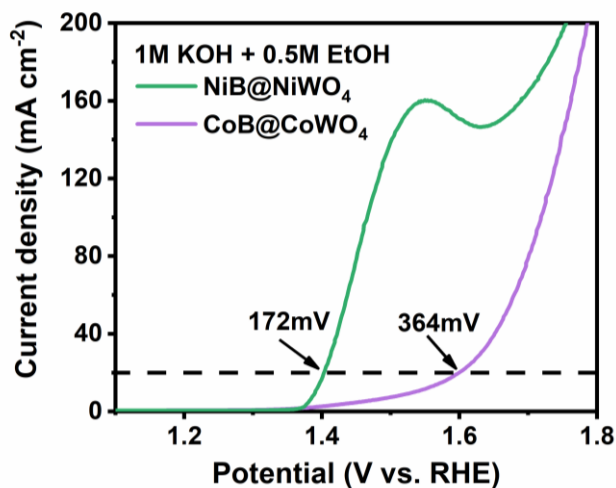

**Figure S6.** LSV curve of NiB@NiCoWO<sub>4</sub> and CoB@CoWO<sub>4</sub> in 1M KOH with 0.5M EtOH.

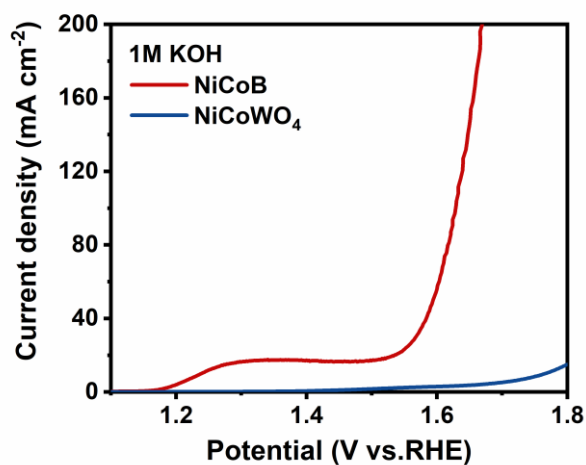

**Figure S7.** LSV curve of NiCoB and NiCoWO<sub>4</sub> in 1M KOH.

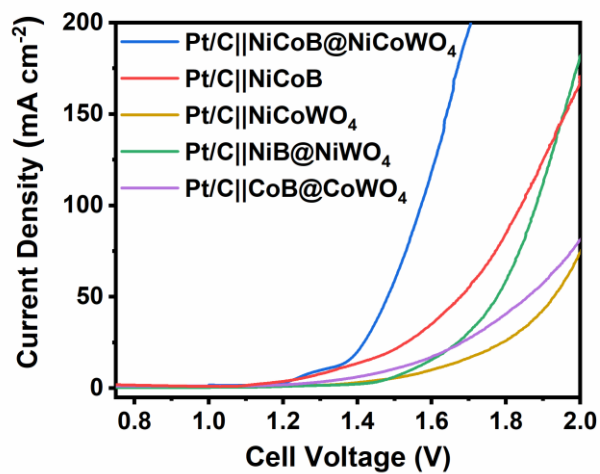

**Figure S8.** LSV curves of the ethanol-water electrolysis employed different electrodes.

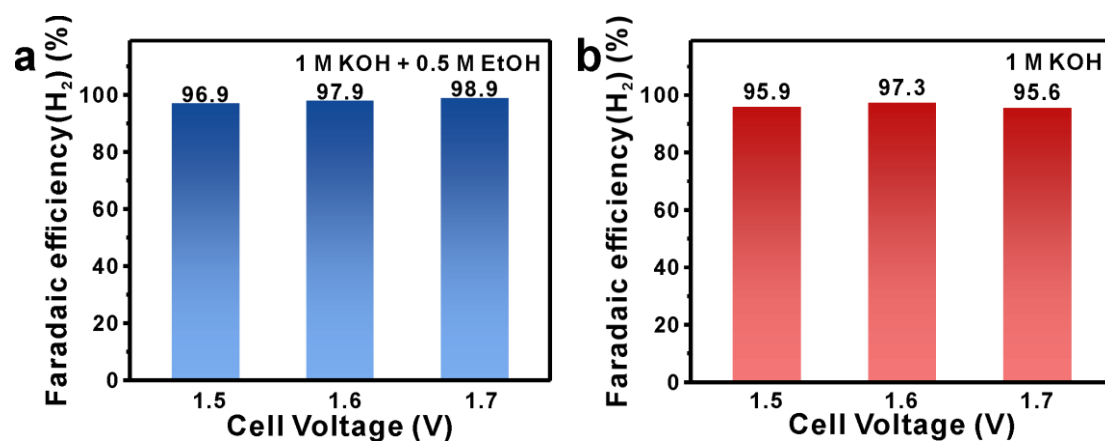

**Figure S9.** Faradaic efficiencies of H<sub>2</sub> generation at different potentials in KOH.

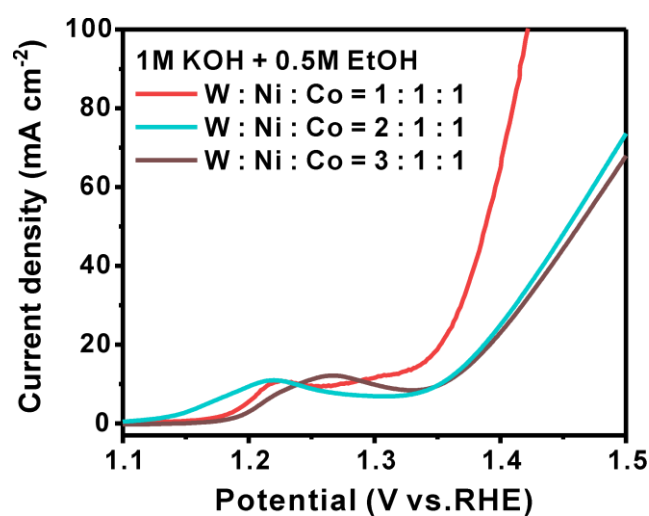

**Figure S10.** LSV curves of the NiCoB@NiCoWO<sub>4</sub> with different metal ratio.

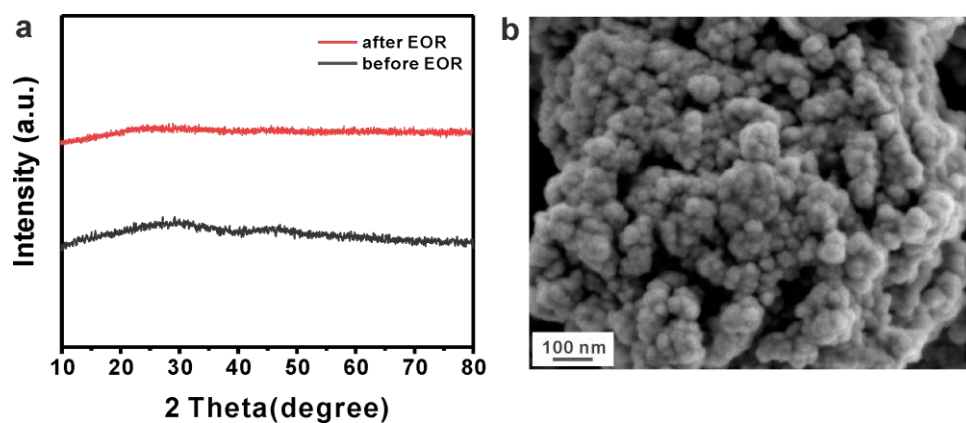

**Figure S11.** Characterization of the NiCoB@NiCoWO<sub>4</sub> after electrochemical reactions. (a) XRD pattern, (b) SEM image.

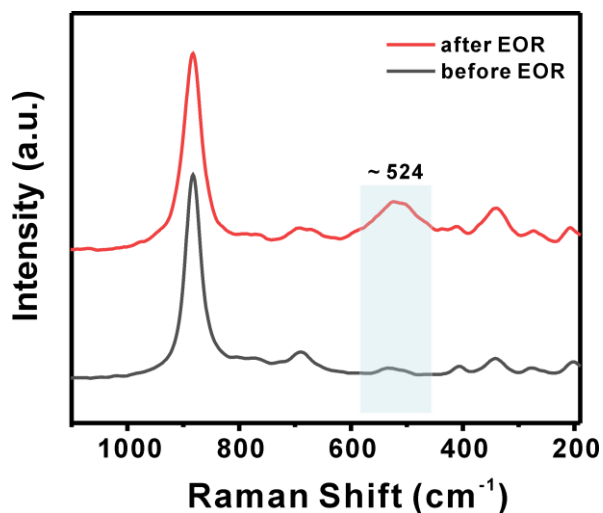

**Figure S12.** The Raman spectra of the NiCoB@NiCoWO<sub>4</sub> before and after electrochemical reactions.

**Table S1.** Comparison of electrocatalytic ethanol oxidation properties of the actual material with other selected catalysts reported in the previous literature.

| Catalysts                                | Electrolyte                   | E (vs.RHE)                  | Ref.      |
|------------------------------------------|-------------------------------|-----------------------------|-----------|
| NiCoB@NiCoWO <sub>4</sub>                | 1.0 M KOH +<br>0.5 M Ethanol  | 1.35V@20mA cm <sup>-2</sup> | This work |
| Co-S-P/CC                                | M KOH + 1.0 M<br>ethanol      | 1.38@10mA cm <sup>-2</sup>  | 1         |
| Perforated CoNi<br>hydroxide nanosheets  | 1.0 M KOH +<br>1.0 M ethanol  | 1.39@10mA cm <sup>-2</sup>  | 2         |
| Co <sub>3</sub> O <sub>4</sub> nanocubes | 1.0 M NaOH +<br>1.0 M ethanol | 1.55@10mA cm <sup>-2</sup>  | 3         |
| Ni <sub>3</sub> Fe/NiFe(OH) <sub>x</sub> | 1.0 M KOH +<br>1.0 M ethanol  | 1.41@10mA cm <sup>-2</sup>  | 4         |
| aFe-NiB                                  | 1.0 M NaOH +<br>0.5 M urea    | 1.298@10mA cm <sup>-2</sup> | 5         |
| Co(OH) <sub>2</sub> @HOS/CP              | 1.0M KOH + 3M<br>methanol     | 1.385@10mA cm <sup>-2</sup> | 6         |
| CoCu-bi-metal-organic<br>framework       | 1.0M KOH + 3M<br>methanol     | 1.365@10mA cm <sup>-2</sup> | 7         |

**Table S2.** Peak assignments for the IR spectra shown in Fig. 7b

| Wave number (cm <sup>-1</sup> ) | mode                                                                       | Reference |
|---------------------------------|----------------------------------------------------------------------------|-----------|
| 1749                            | C=O stretching in CH <sub>3</sub> CHO and CH <sub>3</sub> COOH in solution | 8-10      |
| 1620                            | C=O stretching of adsorbed acetaldehyde and acetyl                         | 9         |
| 1520                            | O-C-O asymmetric stretching of acetate in solution                         | 11        |
| 1457                            | O-C-O symmetric stretching in acetate                                      | 9, 11     |
| 1394                            | CH in-plane bending mode of adsorbed acetate/ acetate in solution          | 9, 11, 12 |
| 1277                            | C-O stretching in CH <sub>3</sub> COOH                                     | 8, 9, 13  |

## Notes and references

1. S. Sheng, K. Ye, L. Sha, K. Zhu, Y. Gao, J. Yan, G. Wang and D. Cao, *Inorg. Chem. Fron.*, 2020, **7**, 4498-4506.
2. W. Wang, Y. B. Zhu, Q. Wen, Y. Wang, J. Xia, C. Li, M. W. Chen, Y. Liu, H. Li, H. A. Wu and T. Zhai, *Adv. Mater.*, 2019, **31**, 1900528.
3. L. Dai, Q. Qin, X. Zhao, C. Xu, C. Hu, S. Mo, Y. O. Wang, S. Lin, Z. Tang and N. Zheng, *ACS Cent. Sci.*, 2016, **2**, 538-544.
4. Y. Gao, Z. Zhao, H. Jia, X. Yang, X. Lei, X. Kong and F. Zhang, *J. Mater. Sci.*, 2019, **54**, 14515-14523.
5. Z. Chen, R. Zheng, H. Zou, R. Wang, C. Huang, W. Dai, W. Wei, L. Duan, B.-J. Ni and H. Chen, *Chem. Eng. J.*, 2023, **465**, 142684.
6. K. Xiang, D. Wu, X. Deng, M. Li, S. Chen, P. Hao, X. Guo, J. L. Luo and X. Z. Fu, *Adv. Funct. Mater.*, 2020, **30**, 1909610.
7. X. Wei, S. Wang, Z. Hua, L. Chen and J. Shi, *ACS App. Mater. Interfaces.*, 2018, **10**, 25422-25428.
8. F. Colmati, G. Tremiliosi-Filho, E. R. Gonzalez, A. Berná, E. Herrero and J. M. Feliu, *Faraday Discuss.*, 2009, **140**, 379-397.
9. M. Li, D. A. Cullen, K. Sasaki, N. S. Marinkovic, K. More and R. R. Adzic, *J. Am. Chem. Soc.*, 2012, **135**, 132-141.
10. S. C. S. Lai, S. E. F. Kleijn, F. T. Z. Öztürk, V. C. van Rees Vellinga, J. Koning, P. Rodriguez and M. T. M. Koper, *Catal. Today*, 2010, **154**, 92-104.
11. Z. Zhou, Q. Wang, J. Lin, N. Tian and S. Sun, *Electrochim. Acta*, 2010, **55**, 7995-7999.
12. J. F. E. Gootzen, W. Visscher and J. A. R. van Veen, *Langmuir*, 1996, **12**, 5076-5082.
13. P. A. Christensen and D. Linares-Moya, *J. Phys. Chem. C*, 2010, **114**, 1094-1101
